# Supplementary material for: A Beta-Herpesvirus with Fluorescent Capsids to Study Transport in Living Cells
Source: PubMed Central journal article supplement (PMC3394720; doi:10.1371/journal.pone.0040585), 2012-07-11
Supplement: pone.0040585.s004.pdf [file pone.0040585.s004.pdf]

**Table S1. Primer sequences**

| Primer                                             | Sequence <sup>a,b</sup>                                               |
|----------------------------------------------------|-----------------------------------------------------------------------|
| MCMV-for <sup>c</sup>                              | ATCATCCGTTGCATCTCGTTG                                                 |
| MCMV-rev <sup>c</sup>                              | CGCCATCTGTATCCGTCCAT                                                  |
| M54-as <sup>c</sup>                                | [FAM]-AACGTACATCGCTCTCTGCTGGCCG-6-carboxytetramethylrhodamine [TAMRA] |
| SCPPfor                                            | GTGTGATATCGTCGTGCTGCGCGAGTCATCC                                       |
| SCPPrev                                            | GTGCTTAAGACTAGTGGCGTAGTCGGGCACGTCGTAGGGGTAGCTGCTGCCGCCGCTTCCTCC       |
| SP-A#II-FP-BsrGI                                   | GTGACTCTTAAGGCCACCATGGTGAGCAAGGGCGAGGA                                |
| ASP-A#II-FP-BsrGI                                  | CACAGTTGTACAGCTCGTCCATGCCGCCGGTGG                                     |
| SP-MCP-binding-negative                            | ATCGTGCAAGCTGGACCTTTAAGACACACATACAGAAAAATAAA                          |
| ASP-MCP-binding-negative                           | AGTCACGGGCCACATGTGCGAGGCC                                             |
| attB1-S-GFP-SCP-attB2-SP                           | GGGACAAGTTTGTACAAAAAAGCAGGCTTACTAGCTCTCTCTACTTTA                      |
| attB1-S-GFP-SCP-binding-negative-No-Stop-attB2-ASP | GGGACCACCTTTGTACAAGAAAGCTGGGTAAAGGTCCAGCTGGTAGGCGAG                   |
| attB1-SCP-S-GFP-SCP-no-stop-attB2-ASP              | GGGACCACCTTTGTACAAGAAAGCTGGGTATTGTATGACGGTGGCTTT                      |

<sup>a</sup> Underlined nucleotides: cleavage sites for restriction enzymes

<sup>b</sup> Italic nucleotides: coding sequences for protein tags

<sup>c</sup> Scrivano, L., J. Esterlechner, H. Mühlbach, N. Ettischer, C. Hagen, K. Grünwald, C. A. Mohr, Z. Ruzsics, U. Koszinowski, and B. Adler. 2010. The m74 gene product of murine cytomegalovirus (MCMV) is a functional homolog of human CMV gO and determines the entry pathway of MCMV. *J. Virol.* 84:4469–4480.
